# Supplementary material for: Improving the photodetection and stability of a visible-light QDs/ZnO phototransistor via an Al2O3 additional layer
Source: Royal Society of Chemistry journal article supplement (doi:10.1039/d0tc05626j), 2021-01-01
Supplement: d0tc05626j1.pdf [file d0tc05626j1.pdf]

**Supporting Information for:**

**Improving photodetection and stability of visible light**

**QDs/ZnO phototransistor via Al<sub>2</sub>O<sub>3</sub> additional layer**

Sungho Park<sup>a</sup>, Byung Jun Kim<sup>a</sup>, Tae Yeon Kim<sup>a</sup>, Eui Young Jung<sup>a</sup>, Kyu-Myung Lee<sup>b</sup>, Jong-Am Hong<sup>b</sup>, Woojin Jeon<sup>a</sup>, Yongsup Park<sup>b</sup> and Seong Jun Kang<sup>a,\*</sup>

<sup>a</sup> Department of Advanced Materials Engineering for Information and Electronics (BK21 four),  
Kyung Hee University, Yongin 17101, Republic of Korea

<sup>b</sup> Department of Physics and Research Institute for Basic Sciences, Kyung Hee University,  
Seoul 02447, Republic of Korea

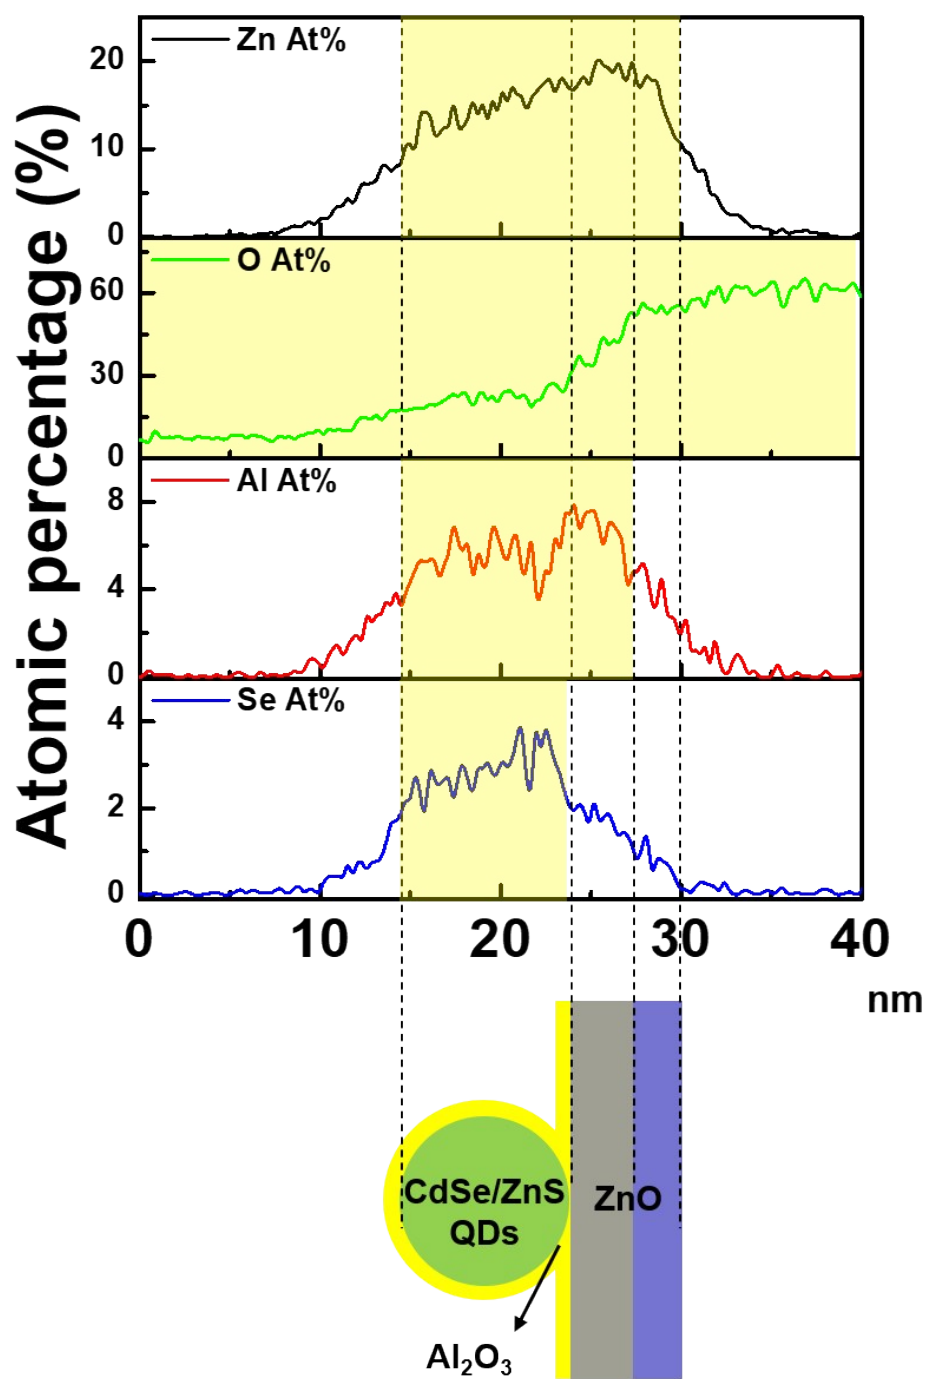

**Figure S1.** EDS line scan showing the depth profile of the elemental distribution.

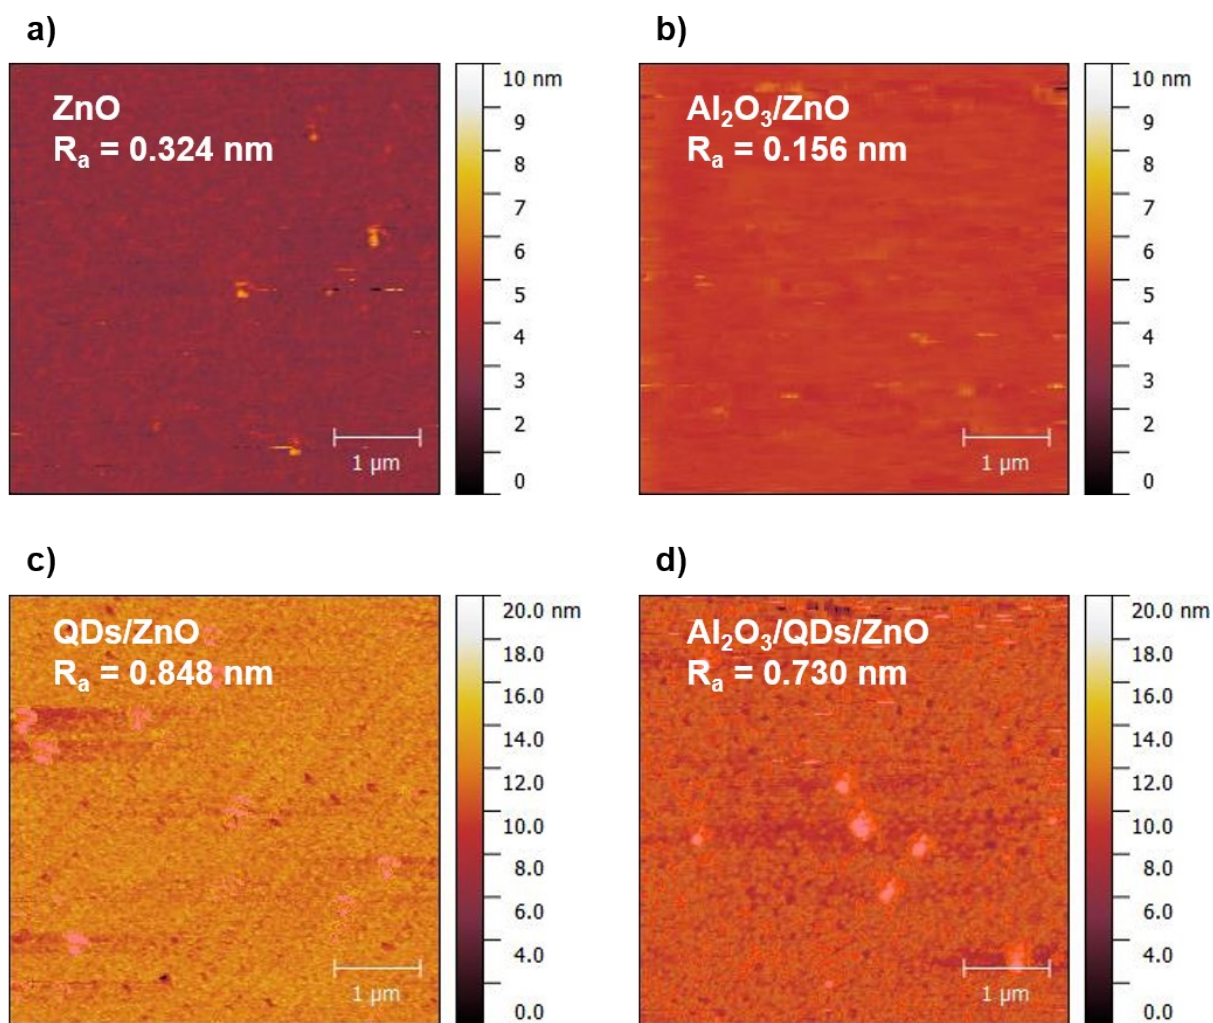

**Figure S2.** AFM topography images and root mean square (RMS) roughness of a) ZnO, b)  $\text{Al}_2\text{O}_3/\text{ZnO}$ , c) QDs/ZnO, and d)  $\text{Al}_2\text{O}_3/\text{QDs}/\text{ZnO}$  films.

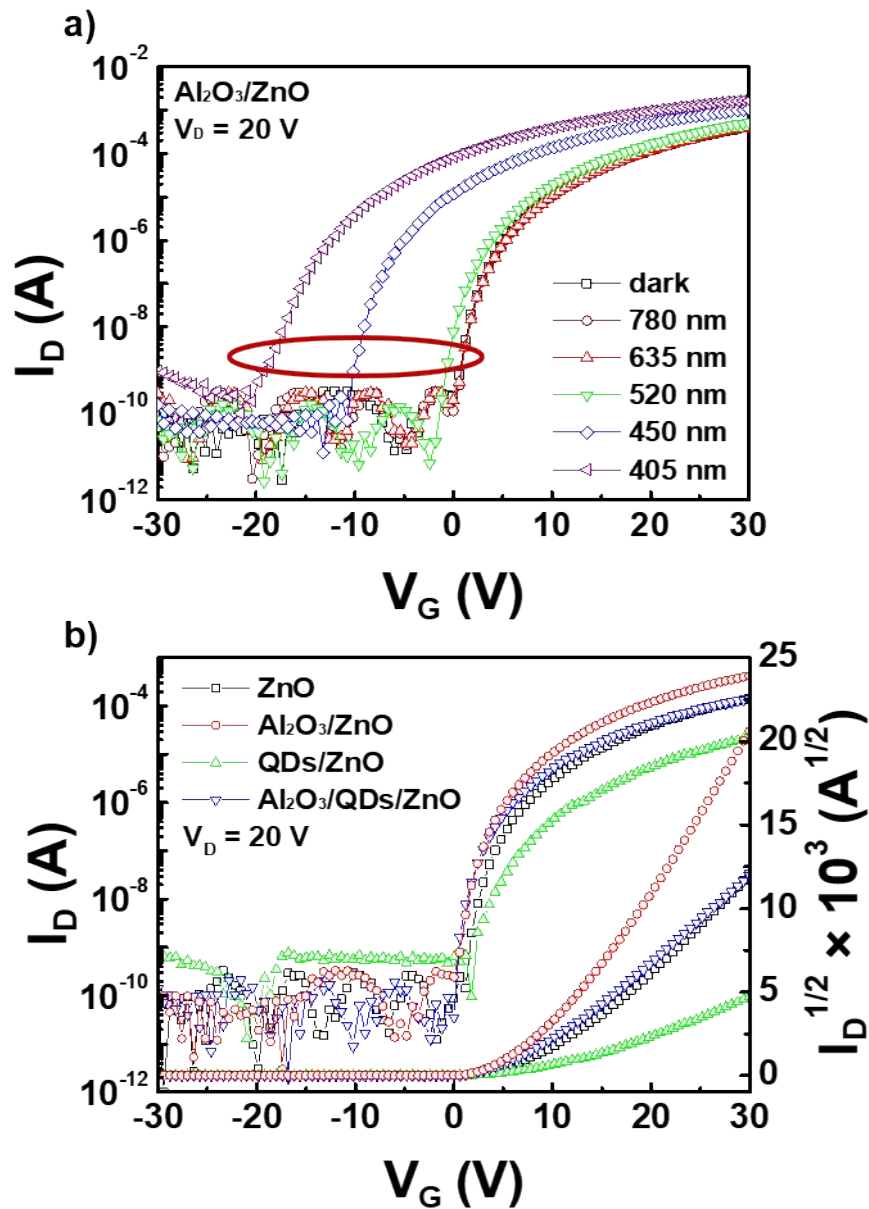

**Figure S3.** a) Transfer curve characteristic (measured at  $V_D = 20$  V) of  $\text{Al}_2\text{O}_3/\text{ZnO}$  TFTs upon irradiation with different wavelengths of light. b) Transfer curve characteristics (measured at  $V_D = 20$  V) of ZnO,  $\text{Al}_2\text{O}_3/\text{ZnO}$ ,  $\text{QDs}/\text{ZnO}$ , and  $\text{Al}_2\text{O}_3/\text{QDs}/\text{ZnO}$  TFTs in darkness.

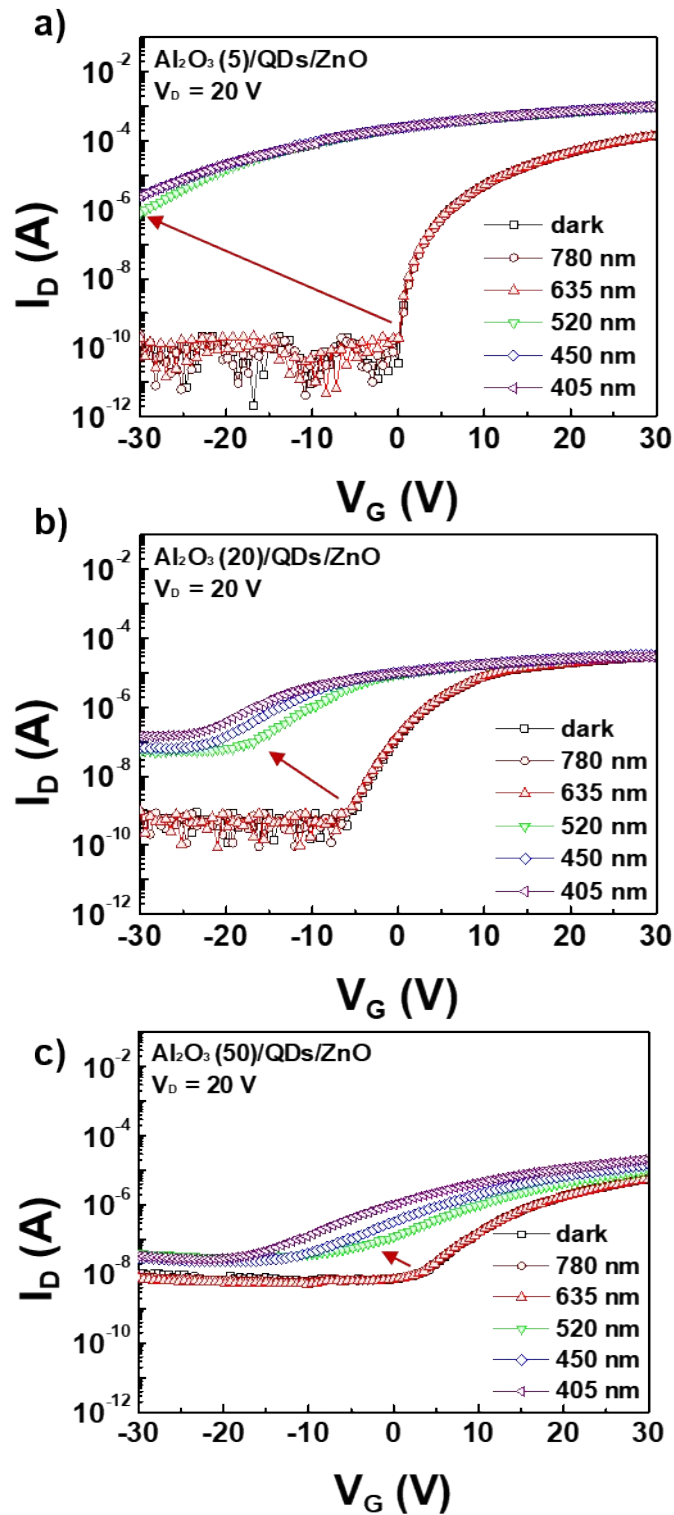

**Figure S4.** Transfer curve characteristic (measured at  $V_D = 20$  V) of QDs/ZnO TFTs deposited with  $\text{Al}_2\text{O}_3$  after a) 5 cycles, b) 20 cycles, and c) 50 cycles upon irradiation with different wavelengths of light.

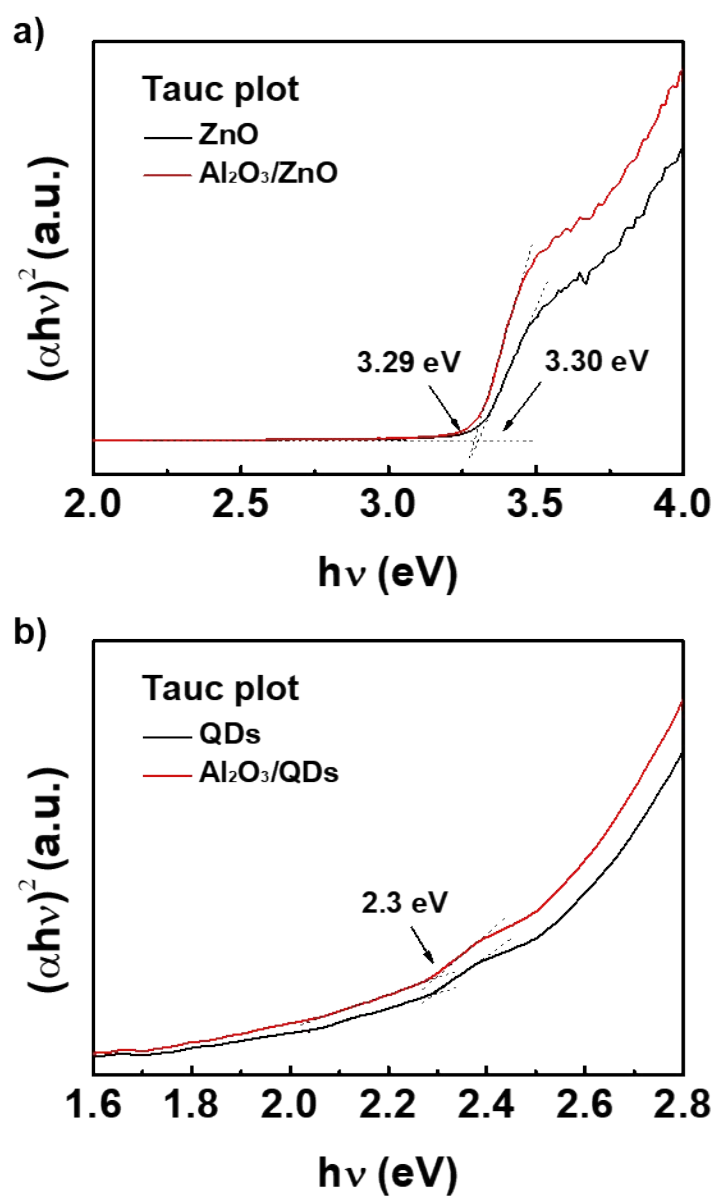

**Figure S5.** Tauc plots of a) ZnO and  $\text{Al}_2\text{O}_3/\text{ZnO}$ , and b) QDs and  $\text{Al}_2\text{O}_3/\text{QDs}$  films.

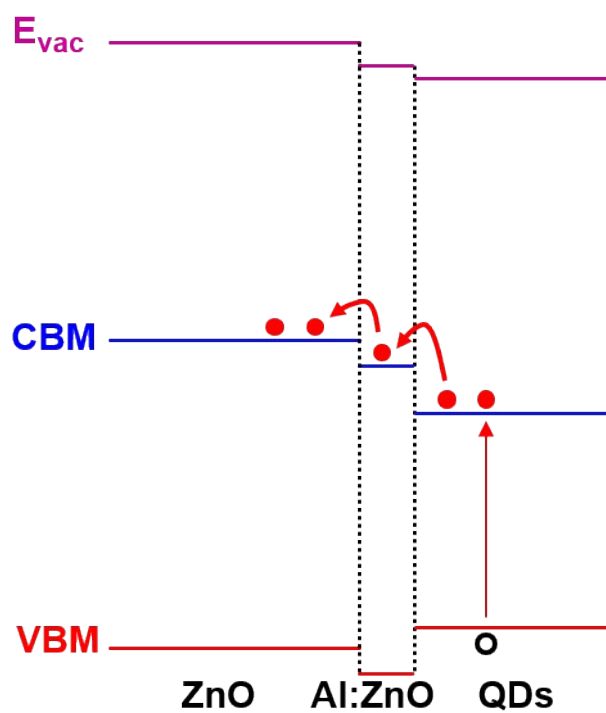

**Figure S6.** Schematic of the photo-generated charge transportation at the  $Al_2O_3/QDs/ZnO$  TFT.

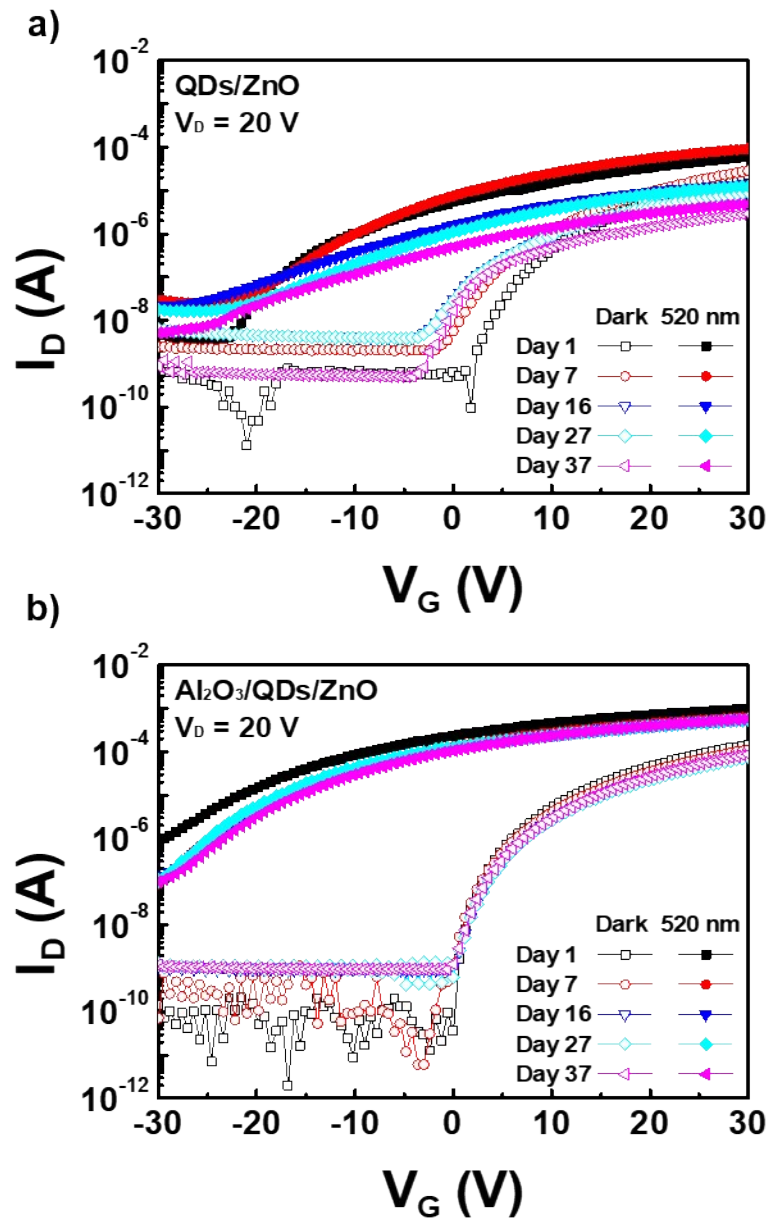

**Figure S7.** Transfer curve characteristics (measured at  $V_D = 20$  V) of a) QDs/ZnO and b)  $\text{Al}_2\text{O}_3/\text{QDs}/\text{ZnO}$  TFTs upon irradiation with 520 nm light, measured periodically after exposure to air at room temperature.
